# Supplementary material for: Assessing Polysaccharides/Aloe Vera–Based Hydrogels for Tumor Spheroid Formation
Source: MDPI journal article supplement (doi:10.3390/gels9010051), 2023-01-07
Supplement: s1 [file s1]

## Supplementary Materials

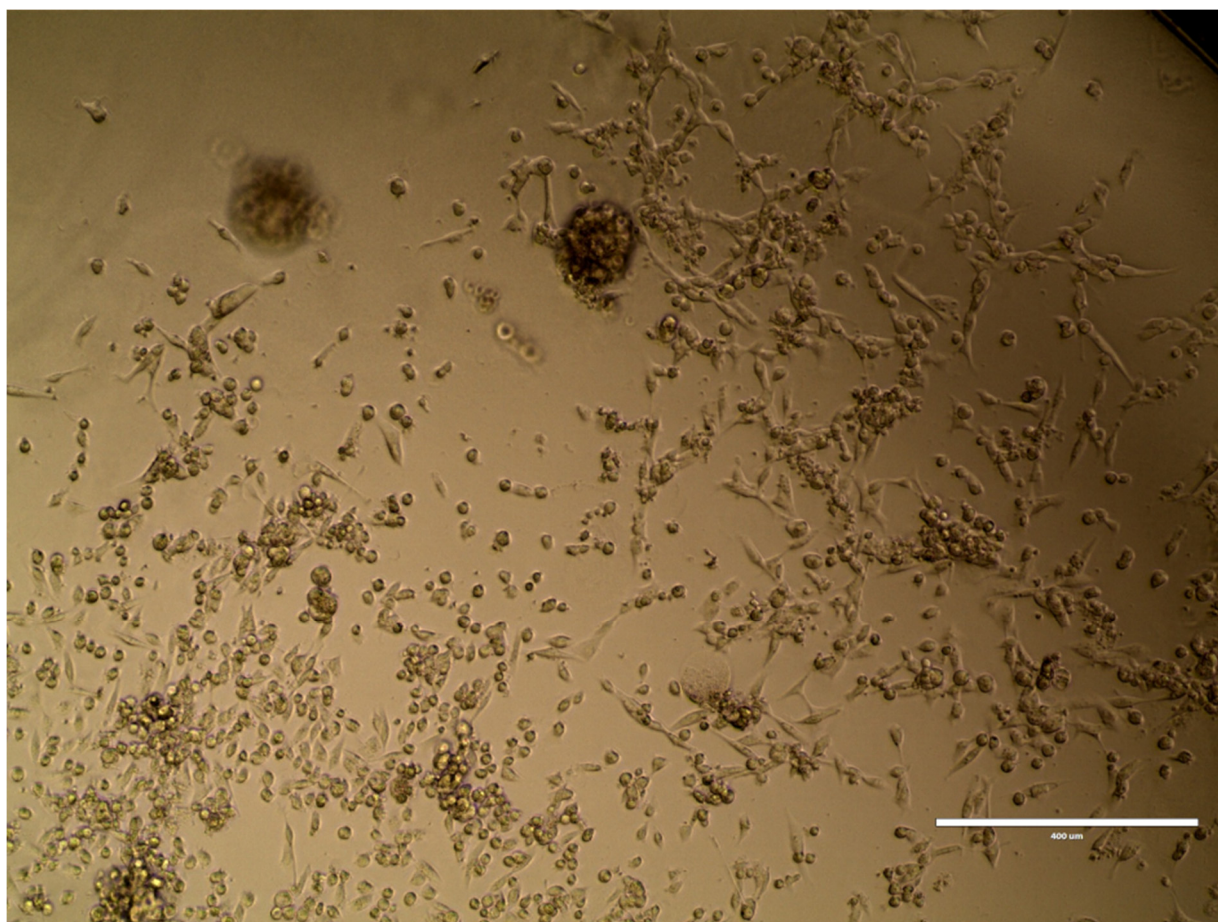

**Figure S1.** Image of mixed 2D and 3D cell culture of MDA-MB-231.

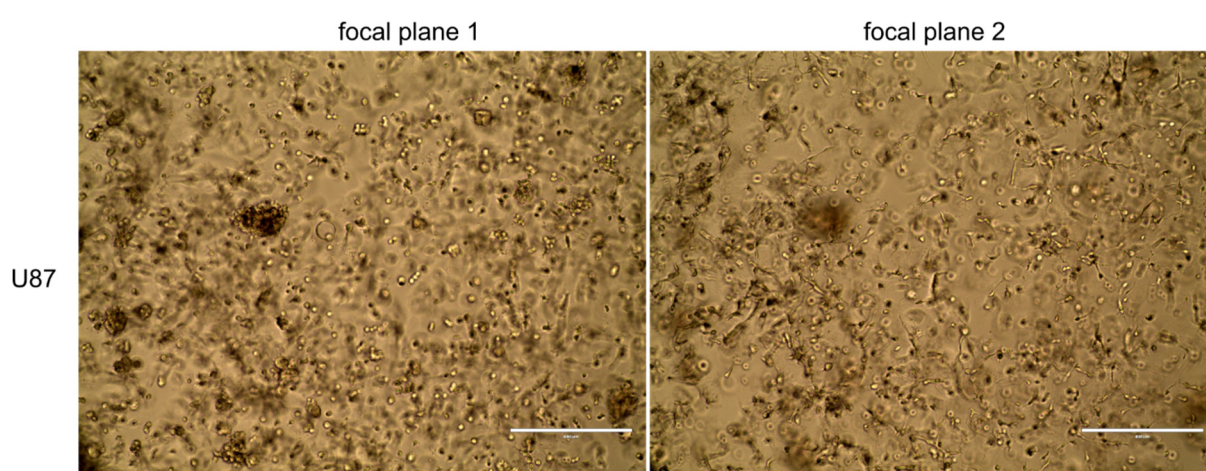

**Figure S2.** Images of mixed 2D and 3D cell culture of U87MG.

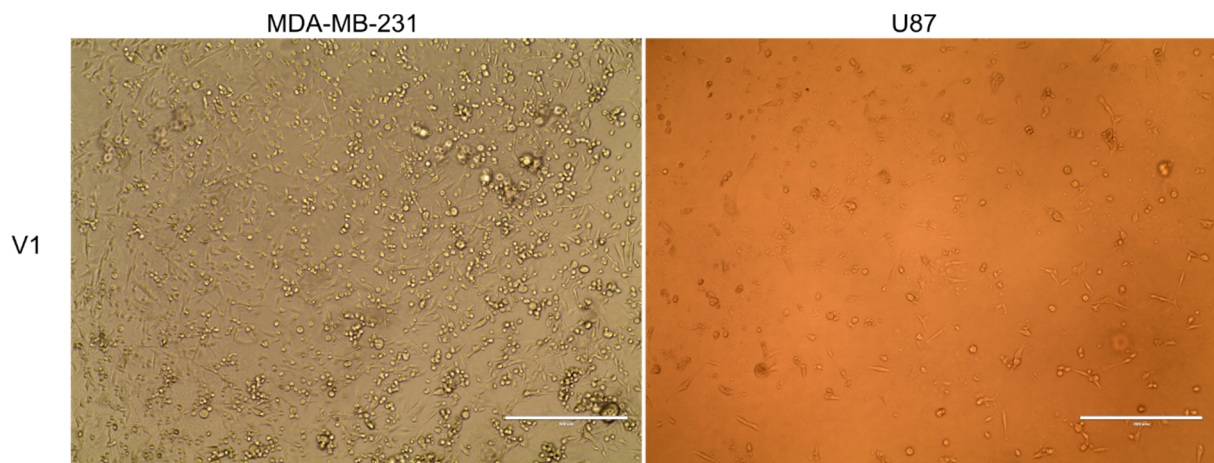

**Figure S3.** Image of MDA-MB-231 and U87MG cell culture developed in V1 hydrogel.

#### **Supplementary R1 – Rheological characterisation**

##### Shear stress vs. shear rate

The shear stress against shear rate rheograms for the studied hydrogels displayed in Figure 1 clearly show an increasing trend of the shear stress with increasing shear rate, which confirms the shear thinning non-Newtonian behavior of the hydrogels.

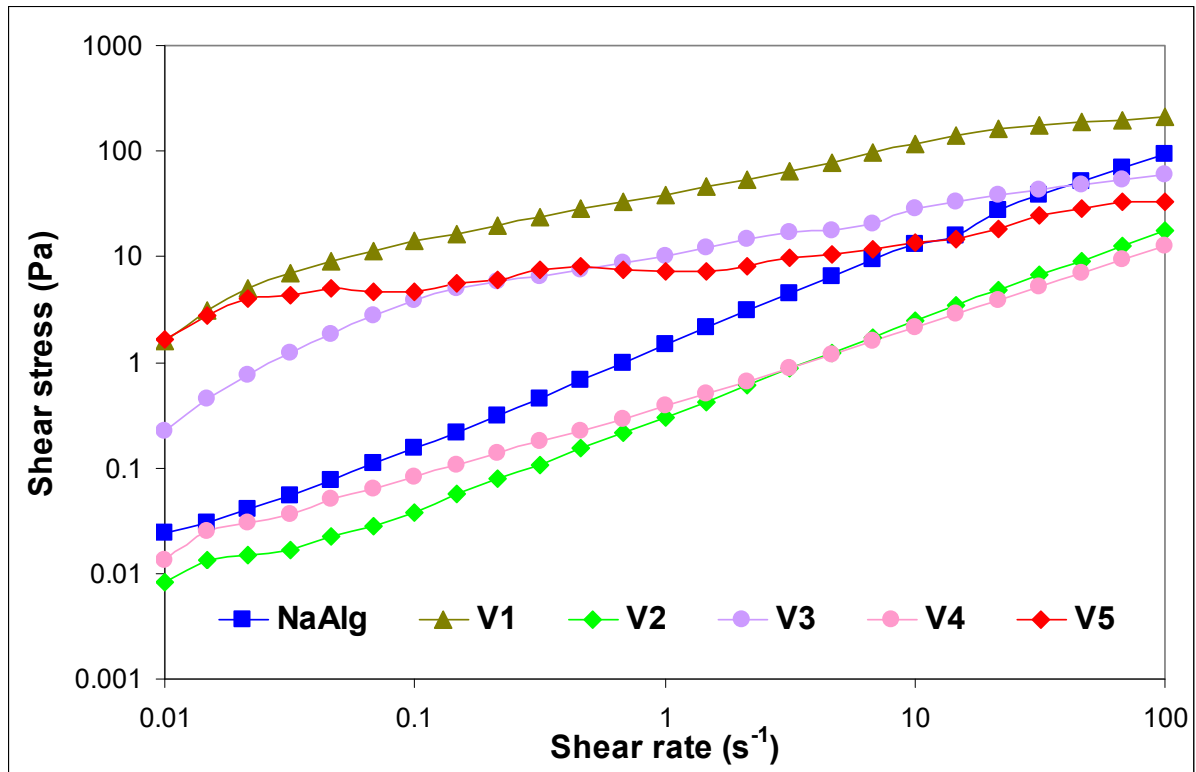

**Figure 1.** Rheograms (shear stress vs. shear rate) recorded for evaluated alginate-based hydrogels at different pHs and 37 °C

Shear stress versus shear rate rheograms recorded for the studied hydrogels (Figure 1) generally follow a power law. The flow behavior index ( $n$ ) values were evaluated from these rheogram using the Ostwald–de Waele model [53, 67] shown in Equation (1):

$$\tau = K\dot{\gamma}^n \quad (1)$$

where  $\tau$  is the shear-stress (Pa),  $\dot{\gamma}$  is the shear-rate (s<sup>-1</sup>), parameter  $K$  represents the flow consistency index, a measure of average viscosity of the fluid, and the power law index  $n$  refers to the flow behavior index, a measure of its deviation from Newtonian behavior [54]. The mathematical relationship of Ostwald–de Waele model approximately describes the behavior of a real non-Newtonian fluid.

The results presented in Table 1 show the flow behaviour index ( $n$ ) has values below unity, corresponding to pseudoplastic (or shear-thinning) fluids. The obtained hydrogels prepared at acidic pH (pH 5) display higher average viscosity ( $K$ ) and is also significantly enhanced shear thinning (lower  $n$  values), while the sample prepared at basic pH (pH 12) have lower flow consistency index  $K$  values, but higher flow behavior index  $n$ .

Table 1. Power law parameters and regression coefficient ( $R^2$ ) evaluated from experimental rheograms

| pH | Samples    | K      | n      | $R^2$  |
|----|------------|--------|--------|--------|
| 5  | NaAlg (2%) | 1.4388 | 0.9323 | 0.9990 |
|    | V1         | 34.594 | 0.4855 | 0.9676 |
|    | V3         | 8.1559 | 0.5257 | 0.9351 |
|    | V5         | 8.5289 | 0.2626 | 0.9361 |
| 12 | V2         | 0.3283 | 0.8515 | 0.9971 |
|    | V4         | 0.4198 | 0.7165 | 0.9986 |

## **Supplementary R2 – Rheological characterisation**

### Frequency sweep tests

The viscoelastic characteristics evaluated from dynamic moduli storage modulus ( $G'$ ) and loss modulus ( $G''$ ), as well as the complex viscosity function of oscillatory frequency outcome the results of the flow behavior tests. The pH has a strong influence on the viscoelastic properties of the evaluated hydrogels (Figure 1), the lower (acidic) the pH, the higher the strength of the resulting developed hydrogels.

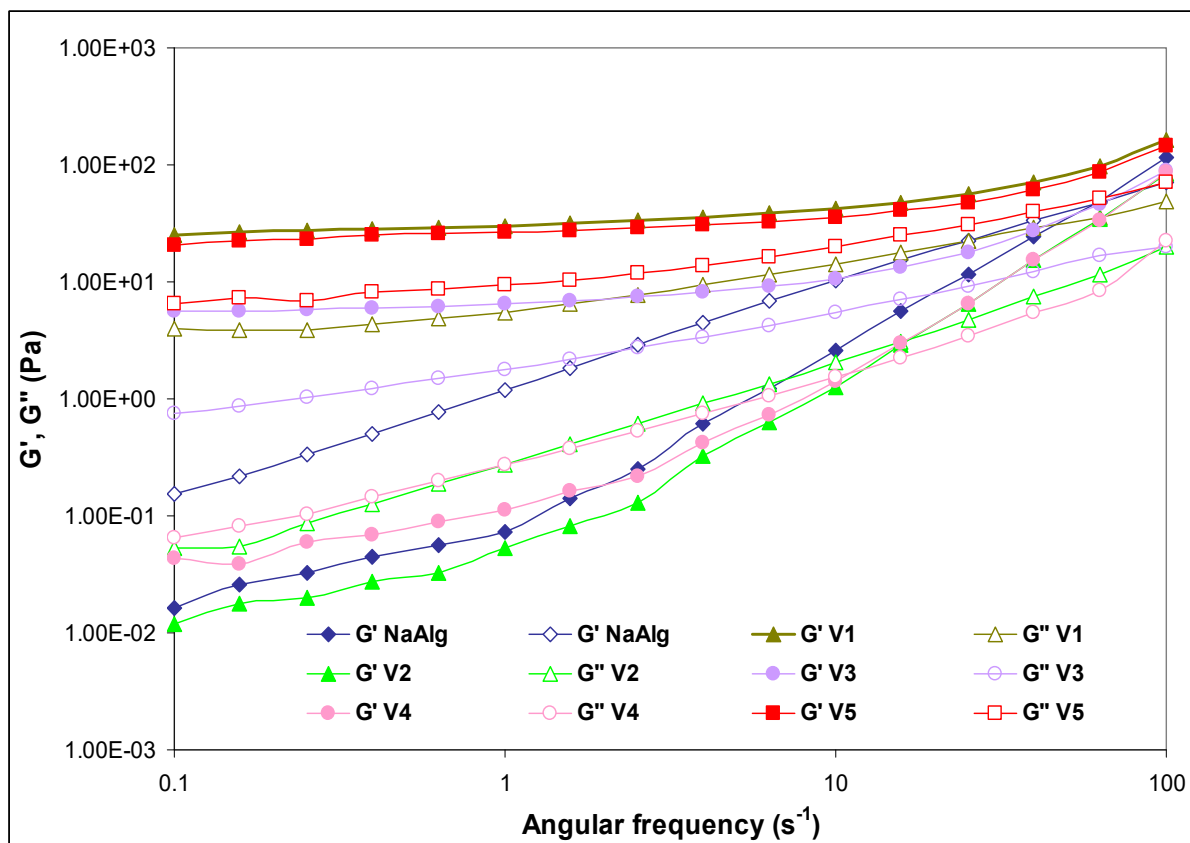

(a)



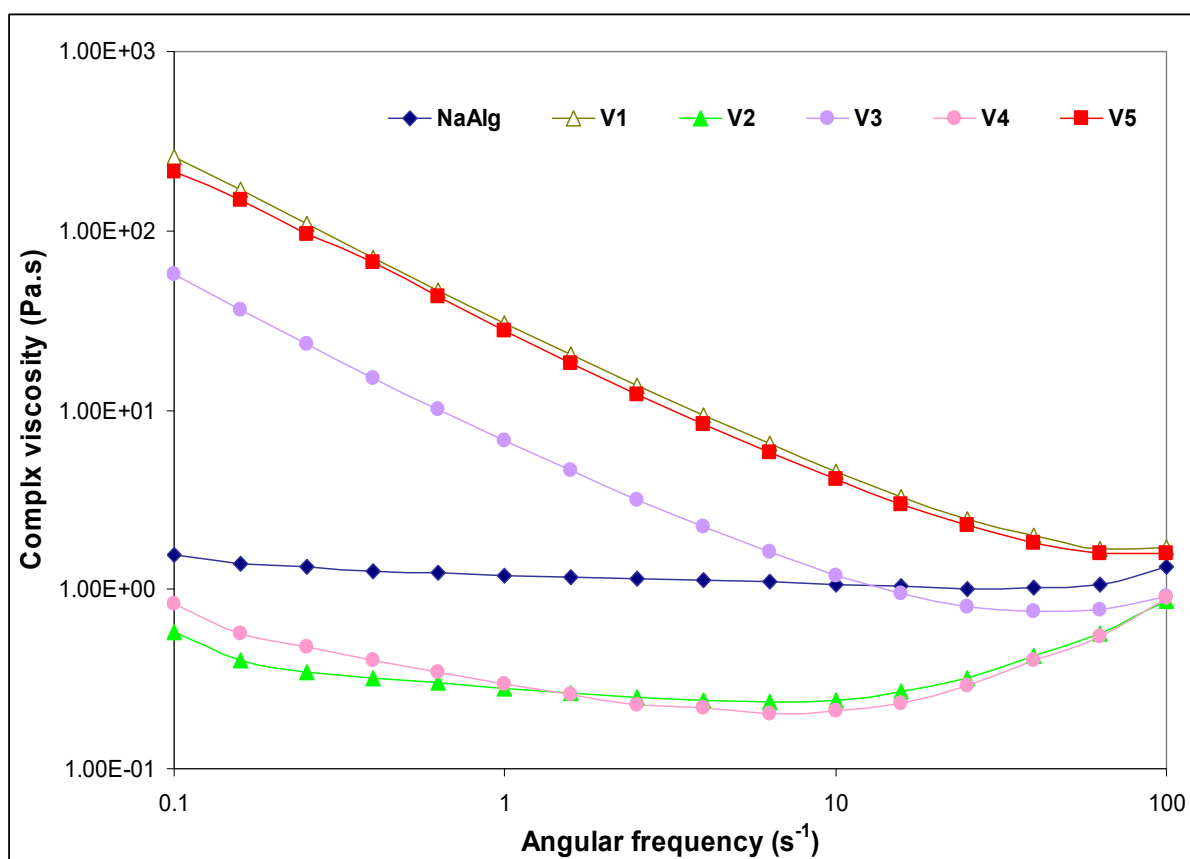

(b)

**Figure 1.** Dependence of (a)  $G'$  and  $G''$  dynamic moduli on the angular frequency and (b) complex viscosity for the alginate-based hydrogels at different pHs and 37°C

The incorporation of Aloe vera or chitosan in the alginate formulation obtained at pH 5 increased over three times the storage modulus and almost twice the loss modulus at low frequencies, resulting in hydrogels more resistant to deformation with a gel-like behavior ( $G' > G''$ ). Other studies also reported development of stiffer materials by incorporation of chitosan within alginate in different concentrations and obtaining methods [68, 69].

The complex viscosity of NaAlg sample is independent of the deformation frequency, while the hydrogels with basic pH flow easier under oscillation.
